# Supplementary material for: Unraveling the function of Arabidopsis thaliana OS9 in the endoplasmic reticulum-associated degradation of glycoproteins
Source: PubMed Central journal article supplement (PMC3332353; doi:10.1007/s11103-012-9891-4), 2012-02-11
Supplement: 11103_2012_9891_MOESM1_ESM.pdf [file 11103_2012_9891_MOESM1_ESM.pdf]

**Electronic supplementary material for:**

**Unraveling the Function of *Arabidopsis thaliana* OS9 in the Endoplasmic Reticulum-Associated Degradation of Glycoproteins**

*Plant Molecular Biology*

Silvia Hüttner, Christiane Veit, Jennifer Schoberer, Josephine Grass and Richard Strasser

**Corresponding Author:** Richard Strasser

e-mail: [richard.strasser@boku.ac.at](mailto:richard.strasser@boku.ac.at)

phone: +43 1 47654 6705

fax: +43 1 47654 6392

Table S1. Oligonucleotide sequences as used in this study.

Fig. S1. LC-ESI-MS of OS9-GFPglyc purified from *N. benthamiana* leaves.

Fig. S2. Matrix-assisted laser desorption ionization time-of-flight mass spectrometry of N-glycans extracted from *A. thaliana* leaves.

Fig. S3. *os9-1* partially suppresses the *bri1-5* phenotype.

Fig. S4. Expression of OS9-GFP and OS9-GFPglyc in *os9-1 bri1-5* plants restores the *bri1-5* phenotype.

Fig. S5. *os9-1* partially suppresses the *bri1-9* phenotype.

Fig. S6. *os9-1* does not suppress the *bri1-6* phenotype.

Fig. S7. BRI1-5-GFP is retained in the ER.

Fig. S8. Expression of OS9R201A-GFPglyc does not restore the *bri1-5* phenotype in *os9-1 bri1-5* plants.

Fig. S9. *os9-1* seedlings are sensitive to elf18.

Fig. S10. Effect of tunicamycin and paraquat on *os9-1* seedlings.

Table S1. Oligonucleotide sequences as used in this study

| Name               | Sequence (5' – 3')                               |
|--------------------|--------------------------------------------------|
| LBa1               | TGGTTCACGTAGTGGGCCATCG                           |
| At5g35080_1F       | TCTAATGGTATGGCCCTTGTATCCTG                       |
| At5g35080_2R       | GTTCTTCCTTGTTCCTTGTTCGGTCTT                      |
| At5g35080_3F       | AAAAAGCGACGAGTGGATGGAC                           |
| At5g35080_4F       | TTCTAGAATGAGAATCACGCAGATCTTGTT                   |
| At5g35080_5R       | TGGATCCAGAATCAGCTATCATCTTAGGTG                   |
| At5g35080_6F       | CCGTCCGGTGCTATTCTCCTTC                           |
| At5g35080_7R       | AGCGGGTAACTGAAAATGGAGATA                         |
| At5g35080_21R      | tattCTCGAGTCAGAGTTCGTCGTGAGAATCAGCTATCATCTTAGGTG |
| At5g35080_22F      | tataGGATCCATGAGAATCACGCAGATCTTGTT                |
| At5g35080-rev-Sall | TATAGTCGACTGCTTGTTCCTTGTTCCTTCT                  |
| At5g35080_23F      | ATCTTACAGGATCACCTGCCGAAGTCGAGGTGAGGT             |
| At5g35080_23R      | ACCTCACCTCGACTTCGGCAGGTGATCCTGTAAGAT             |
| At1g18260_1F       | AGTAGCAGAAAGGGGGCCGTGGAGT                        |
| At1g18260_2R       | GAGAATCAGGCGACAAGTATCAAGTTT                      |
| At1g18260_10F      | TACTAGTATGAGAATATTAAGCTACGGAATCG                 |
| At1g18260_11R      | TAGATCTCCGTGGGAACGCAGCGAGGTGTT                   |
| BRI1_1F            | tGGATCCATGAAGACTTTTTCAAGCTTCTTTCTCT              |
| BRI1_2R            | tGGATCCTAATTTTCCTTCAGGAACTTCTTTTATAC             |
| BRI1_7F            | GTTTCTGGACATGTTTTACAACATGTTGT                    |
| BRI1_7R            | ACAACATGTTGTAAAACATGTCCAGAAAC                    |
| BRI1_10F           | TACGTTGTTGAAGATGAGAGGACT                         |
| BRI1_13F           | CAAAAACGATGGGATGAAGAAAGAGT                       |
| BRI1_14R           | ACACCGCGGAAGAGGATAACCACAG                        |
| BRI1_15F           | TTCTTCTTCTCCTTCTTTTCTCTTTCATT                    |
| BRI1_16R           | ACGACGTTAGCACCGGAGATTGAA                         |
| BRI1_17F           | tataACTAGTATGAAGACTTTTTCAAGCTTCTTTCTC            |
| BRI1_18R           | tataGGATCCGATTTTGTTCGCTAATCGCTAA                 |
| Sc_CPY_1F          | CCATCGGGAACCCTTACTCTTG                           |
| Sc_CPY_5R          | CACAGGCCATTGGTTCGTAA                             |
| Sc_Yos9_1F         | ATTCTATATTTGGTTGGGTTTTTAAG                       |
| Sc_Yos9_2R         | ATGAACAAATTCTATGCCAGGACAGTA                      |
| Sc_Yos9_7F         | AGGATCCATGCAAGCTAAAATTATATATGCTCTG               |
| Sc_Yos9_8R         | ACTCGAGTTAAAGCTCATCATGTTTCGATGAA                 |
| Sc_Yos9-fw-Sall    | TAATGCCGTCGACTATGAACCGATTTTTTTAG                 |
| KanB               | CTGCAGCGAGGAGCCGTAAT                             |
| KanC               | TGATTTTGATGACGAGCGTAAT                           |
| KanD               | CCCCGGCAAACAGCATTCC                              |
| KanE               | TCACCGAGGCAGTTCATAGG                             |

## Glycosylation site 1, ATSGWTSSQQNISTVMMETQQLVK

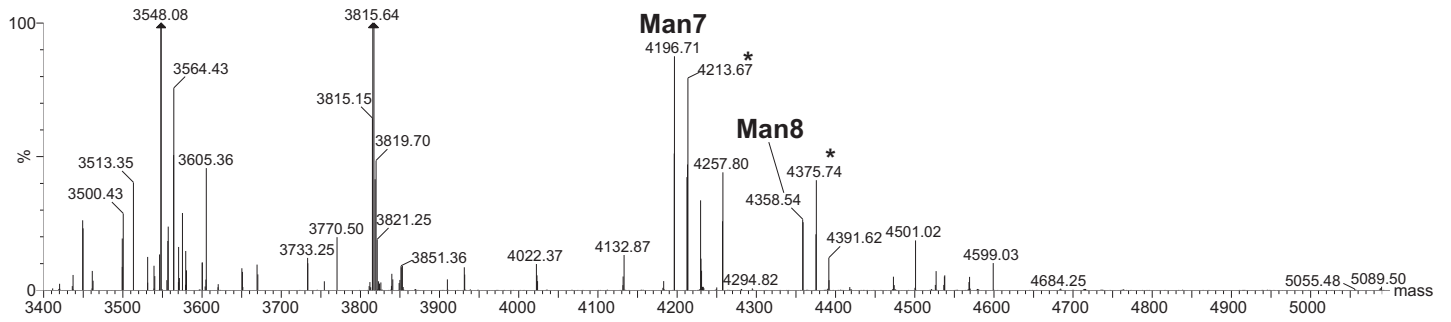

## Glycosylation site 2, IVQEFFLGTFDPEATAAFNQTVS DASTDASQR

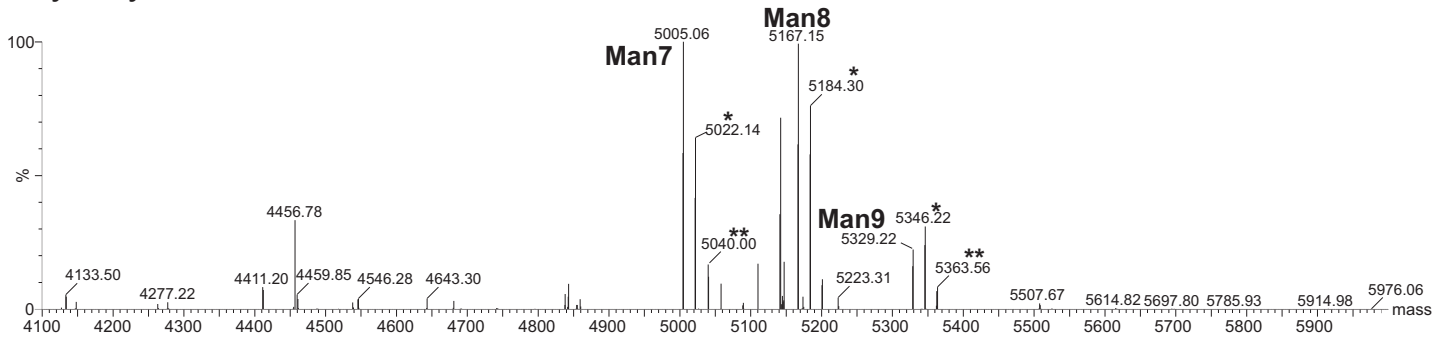

## Glycosylation site 3, YHSHVYTNGTTCDLTGSPR

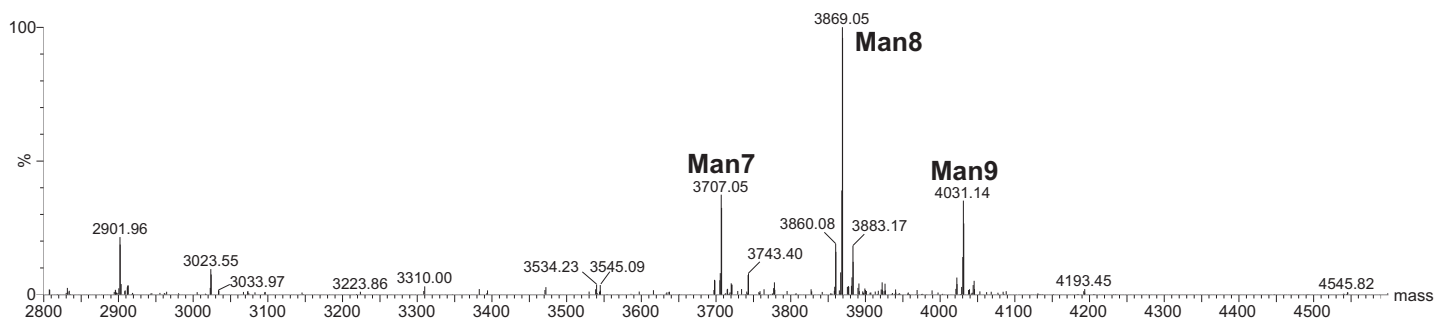

**Fig. S1.** LC-ESI-MS of OS9-GFPglyc purified from *N. benthamiana* leaves. Mass spectra of the three glycopeptides derived from *A. thaliana* OS9 are shown. Man7, Man8 and Man9 are oligomannosidic peaks corresponding to Man7GlcNAc<sub>2</sub>, Man8GlcNAc<sub>2</sub> and Man9GlcNAc<sub>2</sub>. The asterisks indicate ammonia adducts of the same peaks. The whole procedure for purification and detection of glycopeptides has been described previously (Schoberer et al., 2009).

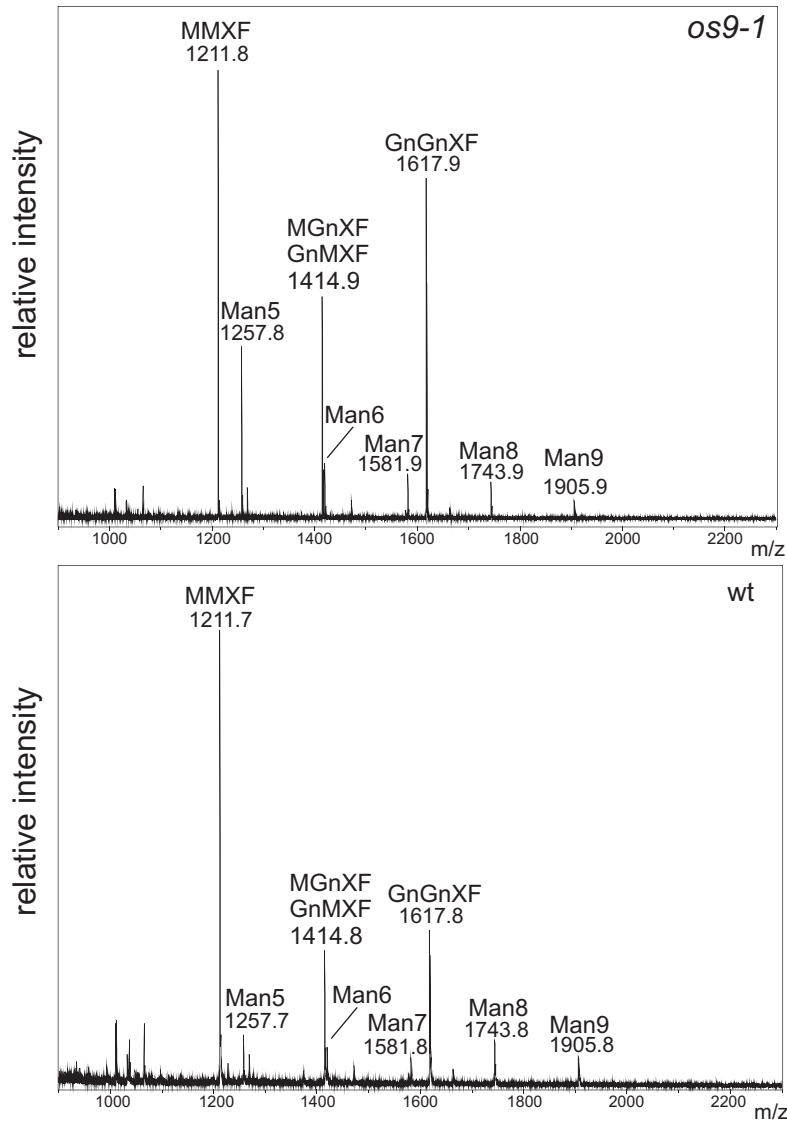

**Fig. S2.** Matrix-assisted laser desorption ionization time-of-flight mass spectrometry (MALDI-TOF-MS) of total N-glycans extracted from leaves of *A. thaliana* plants. Spectra of *os9-1* and wild-type plants are shown. The following oligosaccharide structures are indicated: MMXF: Man3XylFucGlcNAc<sub>2</sub>; Man5: Man5GlcNAc<sub>2</sub>; MGnXF/GnMXF: GlcNAcMan3XylFucGlcNAc<sub>2</sub>; Man6: Man6GlcNAc<sub>2</sub>; Man7: Man7GlcNAc<sub>2</sub>; GnGnXF: GlcNAc<sub>2</sub>Man3XylFucGlcNAc<sub>2</sub>; Man8: Man8GlcNAc<sub>2</sub>; Man9: Man9GlcNAc<sub>2</sub>.

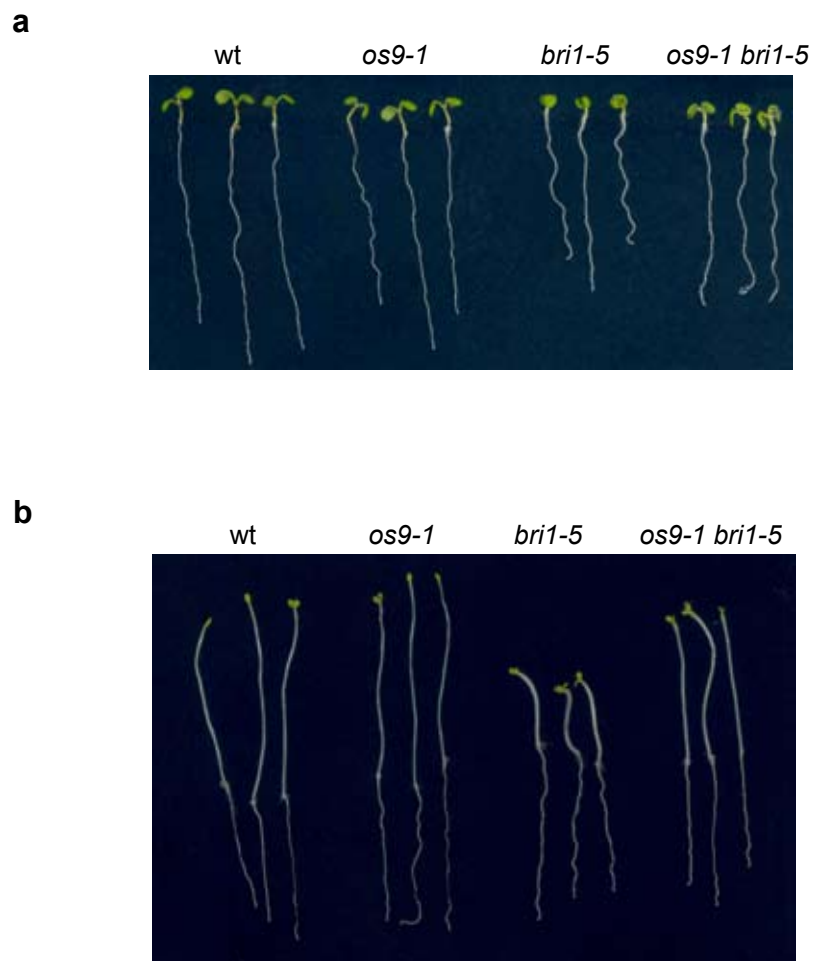

**Fig. S3.** *os9-1* suppresses the *bri1-5* phenotype. Growth of different plants on 1x MS medium with 1.5% sucrose for 8 days at 22°C **(a)** under long-day conditions (16h-light/8h-dark) or **(b)** in the dark.

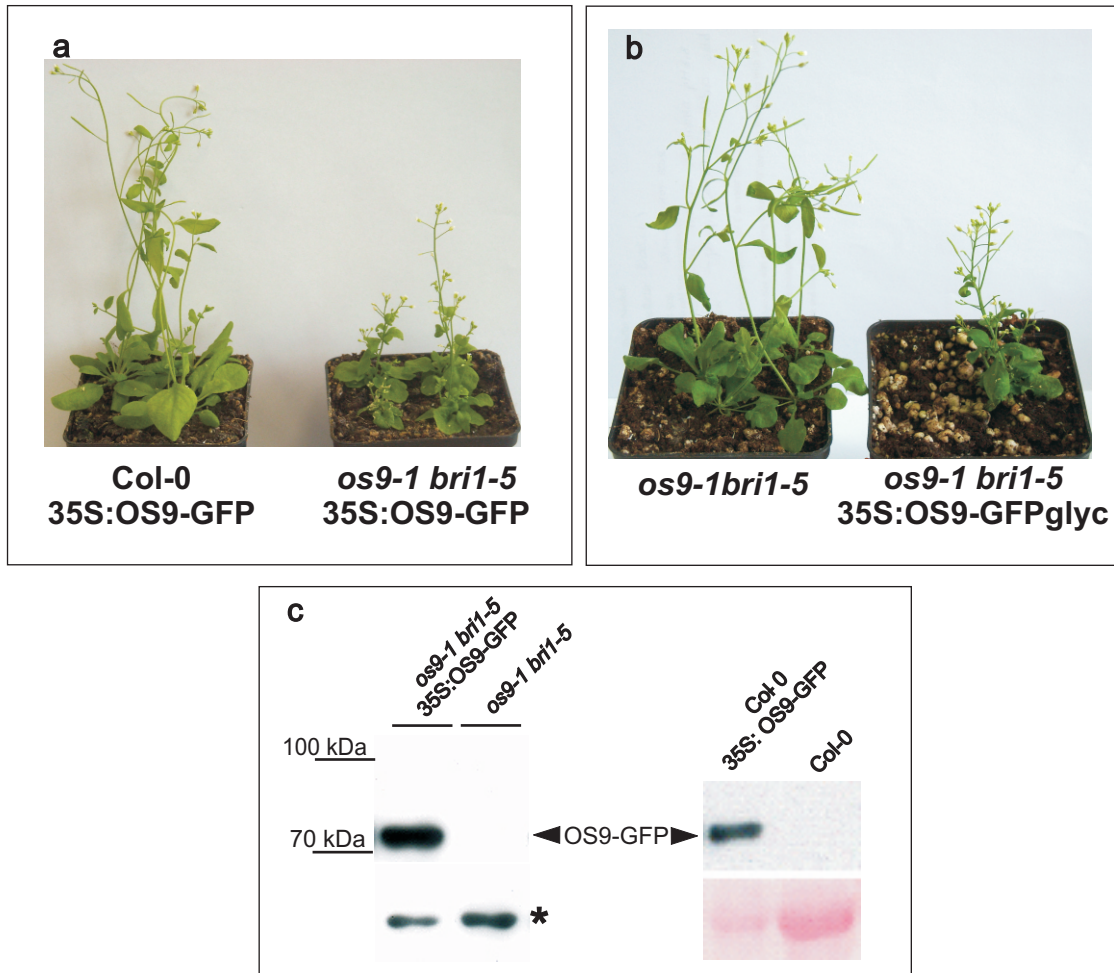

**Fig. S4.** Expression of OS9-GFP or OS9-GFPglyc in *os9-1 bri1-5* plants restores the *bri1-5* growth phenotype. *os9-1 bri1-5* double mutants were floral dipped with **(a)** 35S:OS9-GFP or **(b)** 35S:OS9-GFPglyc. **(c)** Positive transformants were analyzed by immunoblotting with anti-OS9 antibodies for the presence of OS9-GFP expression or OS9-GFPglyc. The asterisk on the immunoblot denotes an unspecific band that served as a loading control.

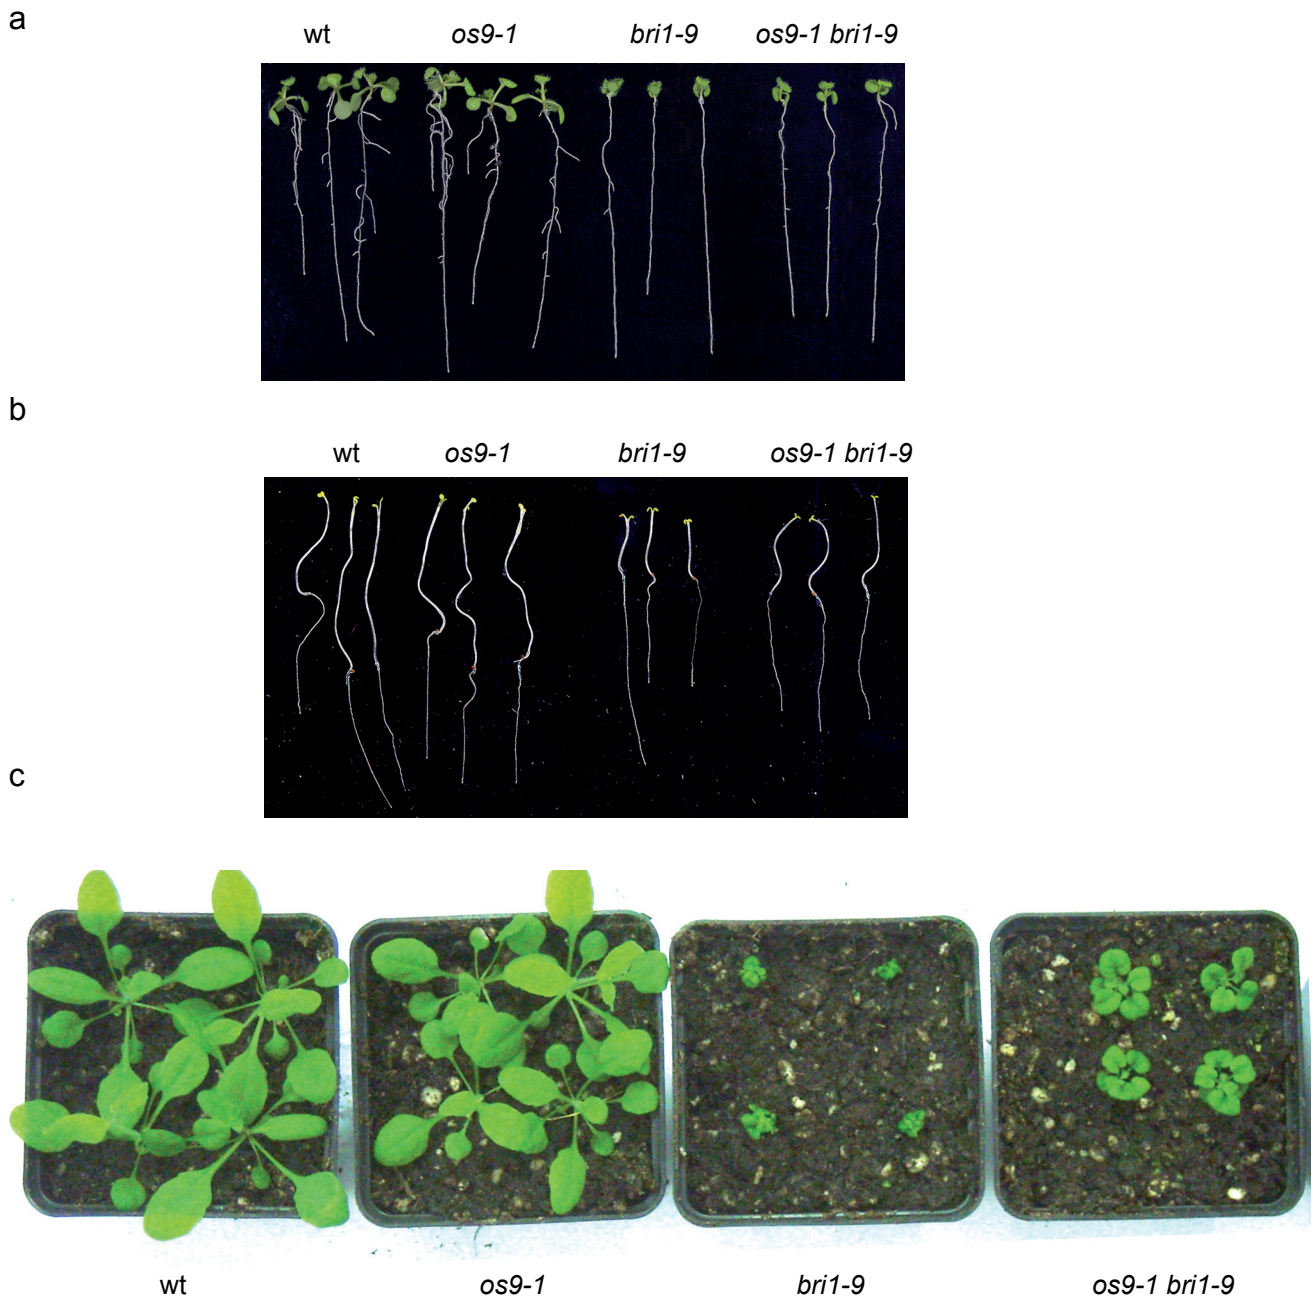

**Fig. S5.** *os9-1* partially suppresses the *bri1-9* phenotype. Growth of different plants on 1x MS medium with 1.5% sucrose for 2 weeks at 22°C **(a)** under long-day conditions (16h-light/8h-dark) or **(b)** in the dark. **(c)** Growth phenotype of 24 day-old soil-grown plants.

**a**

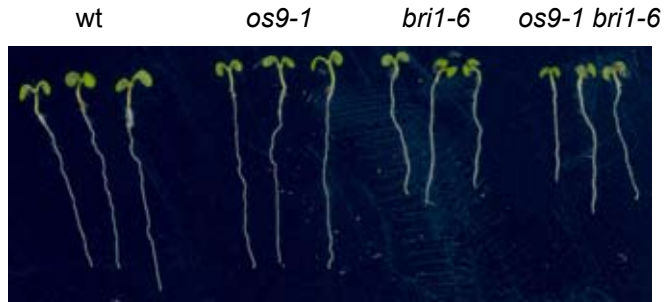

**b**

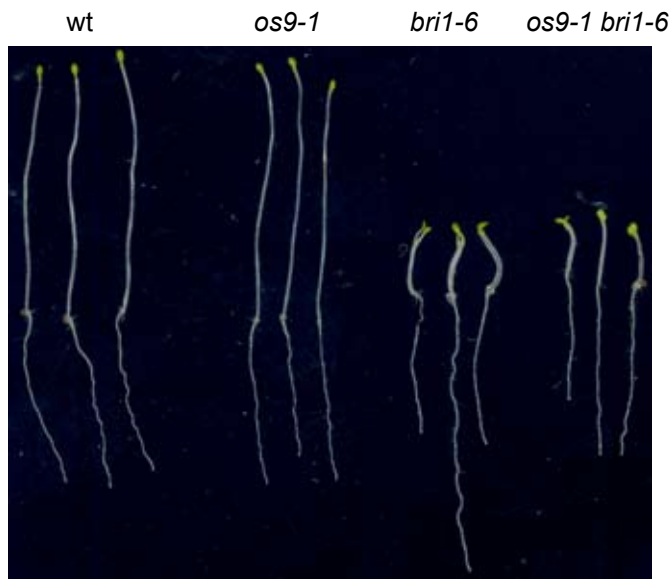

**Fig. S6.** *os9-1* does not suppress the *bri1-6* phenotype. Growth of different plants on 1x MS medium with 1.5% sucrose for 8 days at 22°C **(a)** under long-day conditions (16h-light/8h-dark) or **(b)** in the dark.



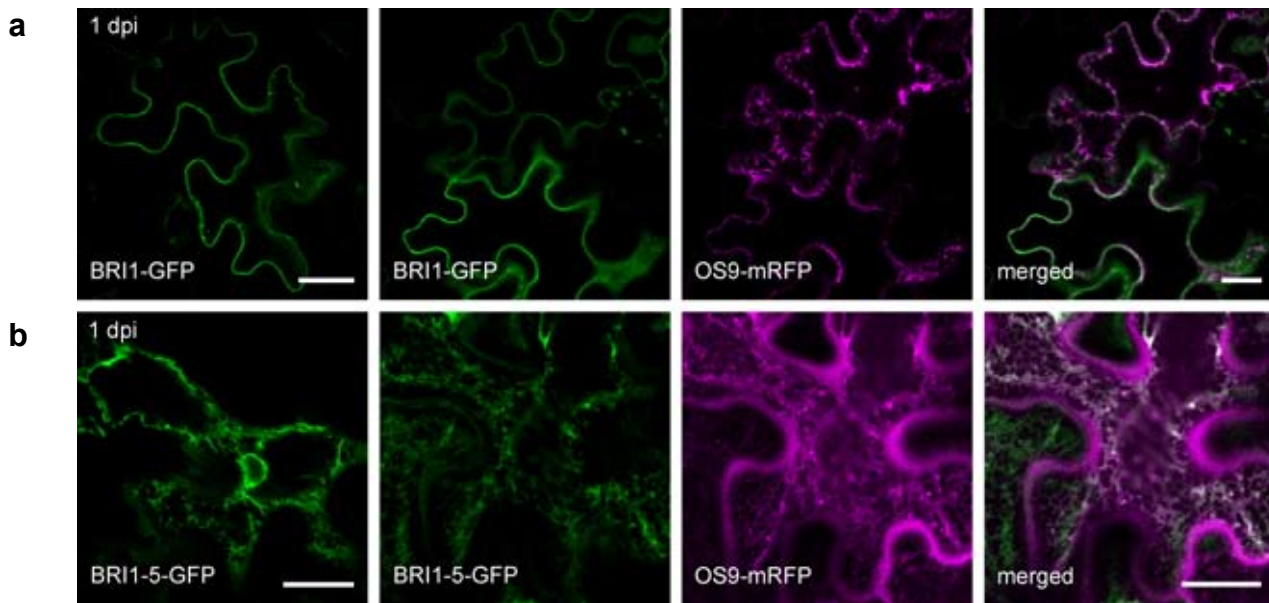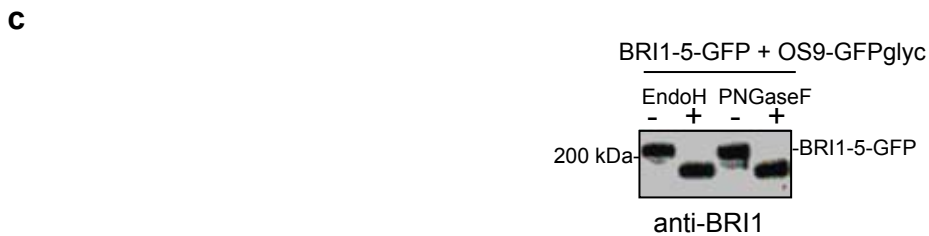

**Fig. S7.** BRI1-5-GFP is retained in the ER. Co-expression of different BRI1-forms in *N. benthamiana* leaf epidermal cells. Confocal images were taken 1 day after infiltration ( $OD_{600} = 0.15$ ). Scale bars = 20  $\mu$ m. **(a)** Co-expression of BRI1-GFP (in green) and OS9-mRFP (in magenta). The first image shows BRI1-GFP alone, followed by the images showing co-expression. **(b)** Co-expression of BRI1-5-GFP (in green) and OS9-mRFP (in magenta). The first image shows BRI1-5-GFP alone, followed by the images showing co-expression. **(c)** Immunoblot analysis suggests that BRI1-5 carries only oligomannosidic N-glycans indicative of ER-localization of BRI1-5 and OS9. Transient expression was done in *N. benthamiana*  $\Delta$ XF plants, which contain low amounts of core  $\alpha$ 1,3-fucose. Complex N-glycans from this plant are therefore sensitive to PNGase F digestion.

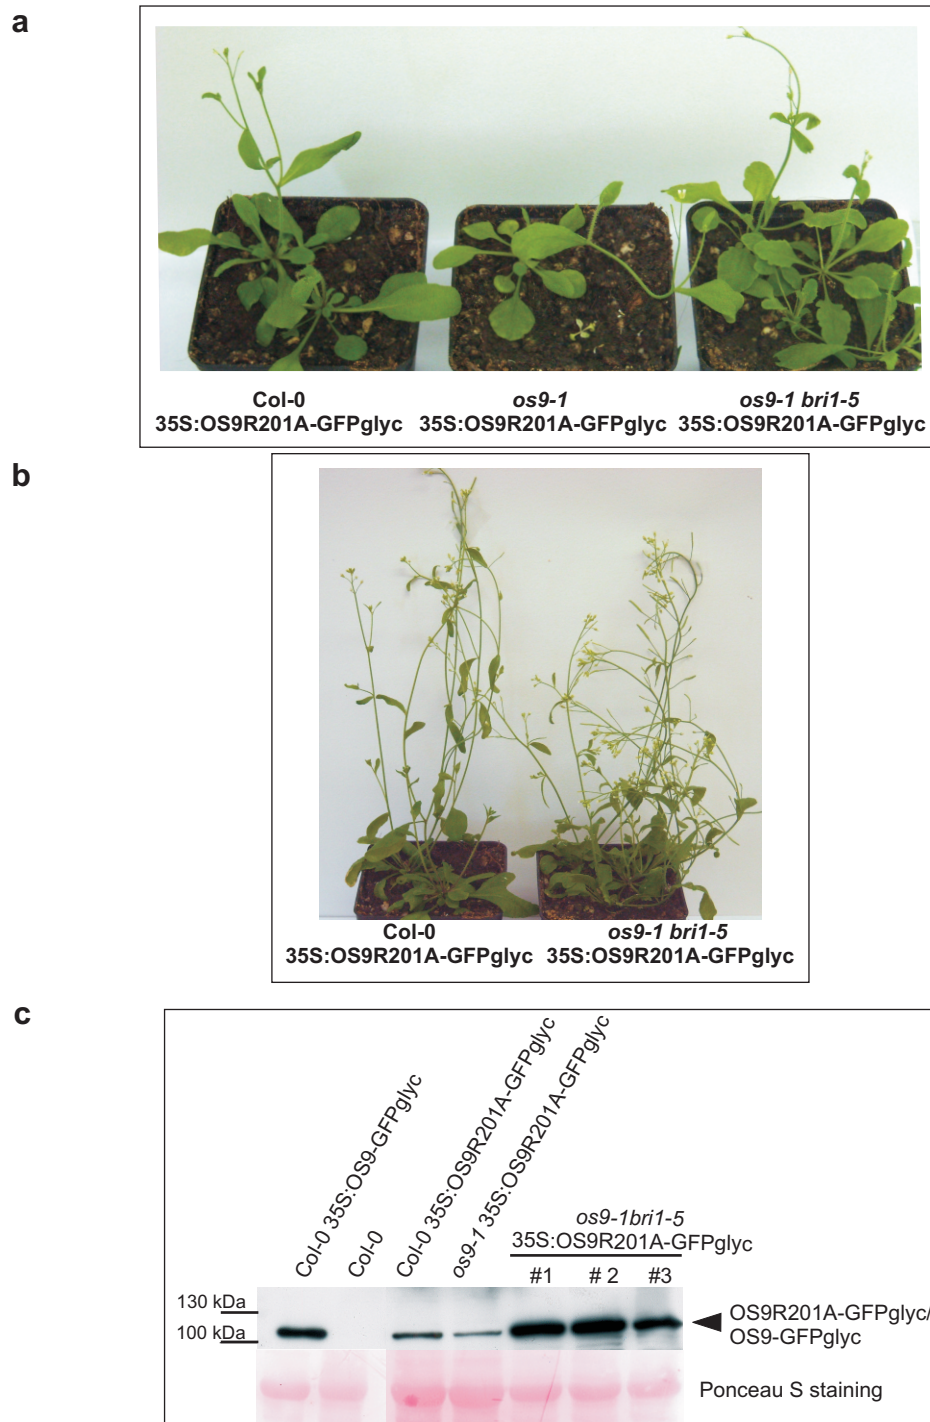

**Fig. S8.** Expression of OS9R201A-GFPglyc does not restore the *bri1-5* growth phenotype in *os9-1 bri1-5* plants. *os9-1 bri1-5* double mutants, *os9-1* mutants and wild-type (wt) were floral dipped with 35S:OS9R201A-GFPglyc. Positive transformants were grown on soil (**a** and **b**) and OS9R201A-GFPglyc expression was confirmed by (**c**) immunoblotting with anti-OS9 antibodies for the presence of OS9-GFPglyc expression.

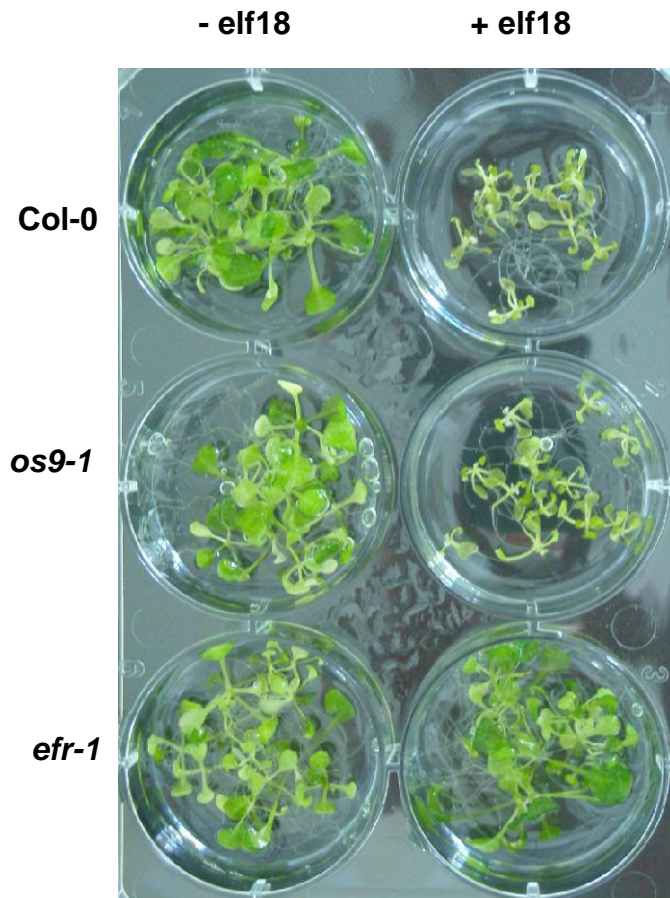

**Fig. S9.** *os9-1* seedlings are sensitive to elf18. A seedling growth inhibition assay in the absence (- elf18) or presence (+ elf18) of elf18 peptide is shown. The elf18 peptide blocks seedling growth of *os9-1* similar to wild-type seedlings (Col-0), while the mutant *efr-1* (Zipfel et al., 2006) that served as a control is insensitive to elf18. Seven-day-old seedlings were incubated for one week in 1x MS liquid medium containing 1% sucrose in the presence of 50 nM elf18 peptide.

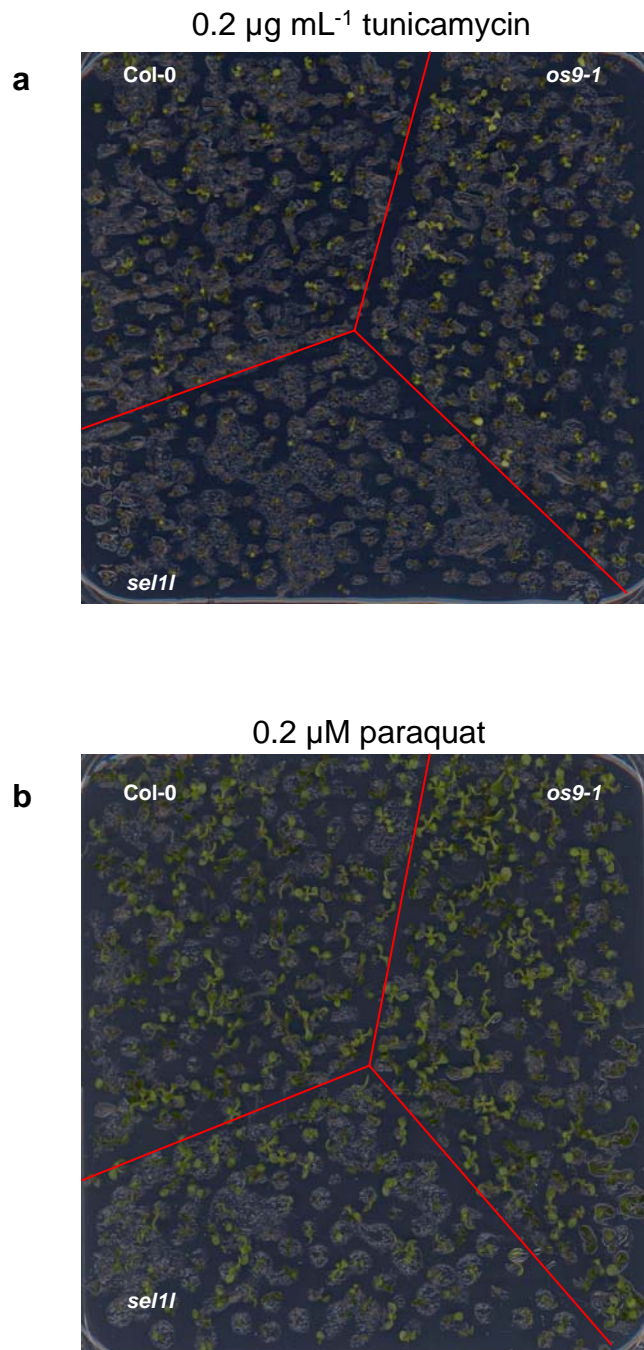

**Fig. S10.** Effect of tunicamycin and paraquat on *os9-1* seedlings. Seeds were germinated on  $\frac{1}{2}\times$  MS medium containing 1.5% sucrose **(a)** in the presence of  $0.2 \mu\text{g mL}^{-1}$  tunicamycin or **(b)** in the presence of  $0.2 \mu\text{M}$  paraquat. *sel1l* was used as a control (Liu et al., 2011). Seedlings were photographed after 11 days of treatment.
